# Supplementary material for: Gluing GAP to RAS Mutants: A New Approach to an Old Problem in Cancer Drug Development
Source: MDPI journal article supplement (doi:10.3390/ijms25052572), 2024-02-22

# Gluing GAP to RAS Mutants: A New Approach to an Old Problem in Cancer Drug Development

Supporting material: Table S1

Supporting material: Supplementary Figure S1

**Ivan Randelović<sup>1</sup>, Kinga Nyíri<sup>2,3</sup>, Gergely Koppány<sup>2,3</sup>, Marcell Baranyi<sup>1,4</sup>, József Tóvári<sup>5</sup>, Attila Kigyós<sup>1</sup>, József Tímár<sup>4</sup>, Beáta G. Vértessy<sup>2,3\*</sup> and Vince Grolmusz<sup>6,7\*</sup>**

<sup>1</sup>KINETO Lab Ltd., Budapest, 1037, Hungary

<sup>2</sup>Laboratory of Genome Metabolism and Repair, Institute of Molecular Life Sciences, Research Centre for Natural Sciences, Hungarian Research Network, Budapest, 1117, Hungary

<sup>3</sup>Department of Applied Biotechnology and Food Science, BME Budapest University of Technology and Economics, Budapest, 1111, Hungary

<sup>4</sup>Department of Pathology, Forensic and Insurance Medicine, Semmelweis University, Budapest, 1091, Hungary

<sup>5</sup>Department of Experimental Pharmacology and the National Tumor Biology Laboratory, National Institute of Oncology, Budapest, 1122, Hungary

<sup>6</sup>Mathematical Institute of Eötvös Loránd University, 1117 Budapest Hungary

<sup>7</sup>Uratim Ltd., Budapest, 1118, Hungary

\*corresponding authors: Vince Grolmusz (grolmusz@pitgroup.org) and Beáta G. Vértessy (vertessy.beata@ttk.hu).

Supplementary Table S1: The fifteen experimentally examined molecules, with ZINC numbers, suppliers, catalogue numbers, structures and molecular weights are listed here. The molecules are referred by their numbers in the first column in the main text. The ZINC numbers refer to the <https://zinc.docking.org> resource.



|    |          |                                 |                                                                                      |     |
|----|----------|---------------------------------|--------------------------------------------------------------------------------------|-----|
| 11 | 89701933 | ENAMINE<br>Z1170089564          | 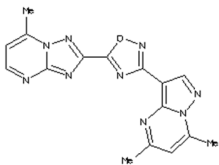   | 347 |
| 12 | 68640014 | ENAMINE<br>Z913154298           |     | 350 |
| 13 | 72278988 | ENAMINE<br>Z985662646           |    | 332 |
| 14 | 96231403 | InterBioScreen<br>STOCK7S-46707 |   | 338 |
| 15 | 96119804 | Life Chemicals<br>F6413-0713    |  | 342 |

Supplementary Figure S1. Differential scanning fluorimetry (DSF) analysis of binding of compound 14 to GAP and KRAS<sup>G12D</sup> proteins. Curves show the average data from three independent experiments, run in triplicates. Melting points are shown in Table 4 in the main text.

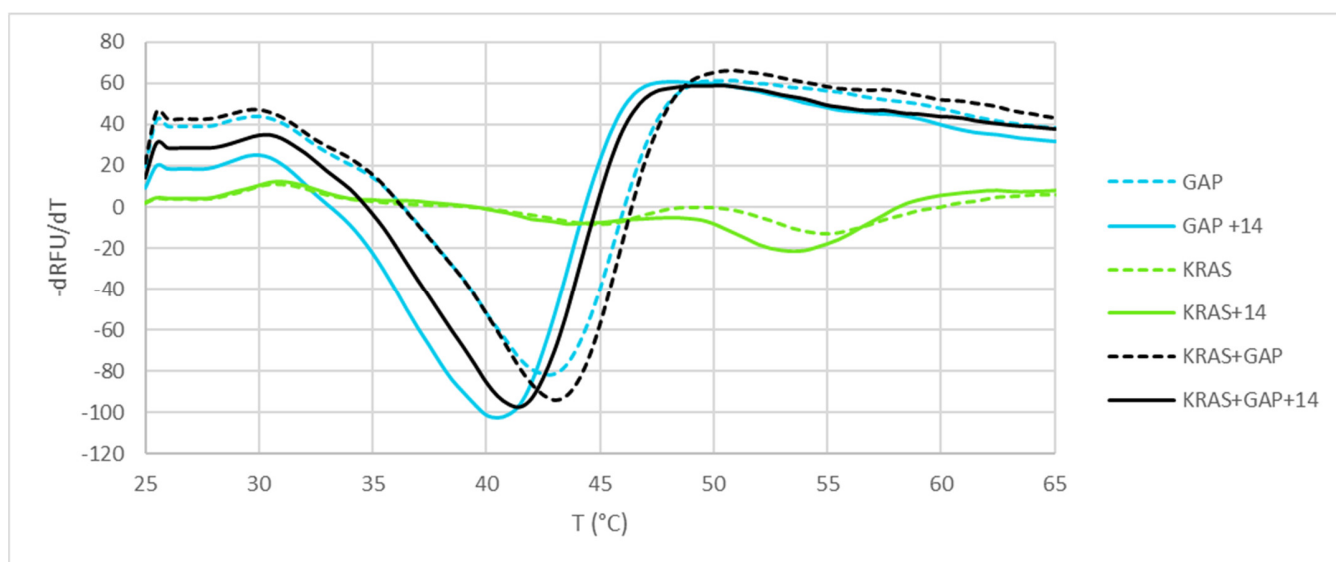

Supplement: s1 [file s1]
